# Supplementary material for: Analytical Investigation of Cymbopogon citratus and Exploiting the Potential of Developed Silver Nanoparticle Against the Dominating Species of Pathogenic Bacteria
Source: PubMed Central journal article supplement (PMC6400849; doi:10.3389/fmicb.2019.00282), 2019-02-27
Supplement: Data_Sheet_1.pdf [file Data_Sheet_1.pdf]

## Supplementary Material

### Analytical investigation of *Cymbopogon citratus* and exploiting the potential of developed silver nano-particle against the dominating species of pathogenic bacteria

PriyankaBasera, MeetaLavania\*, Anil Agnihotri, BanwariLal.

The Energy and Resources Institute (TERI), New Delhi

\*Correspondence:

Dr. MeetaLavania

[meetal@teri.res.in](mailto:meetal@teri.res.in)

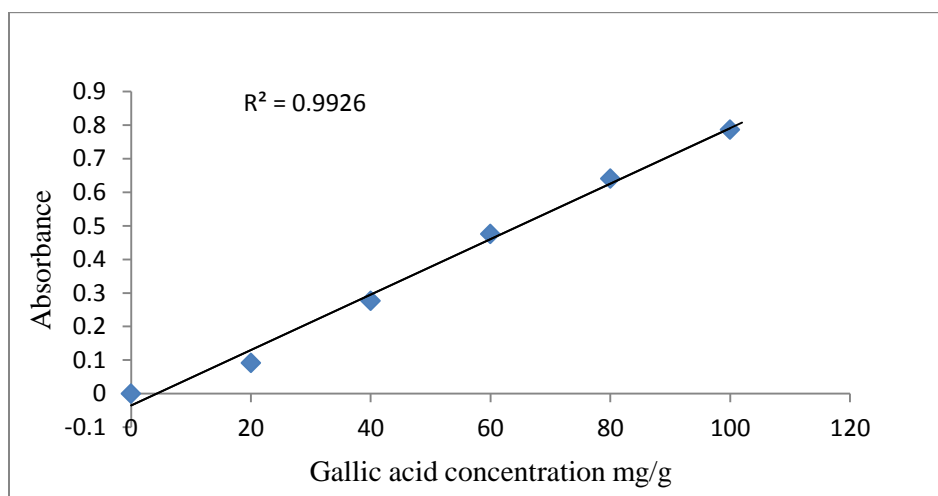

Figure S1 Folin-Ciocalteu gallic acid standard curve.

**Table S1** Mean values of zone of inhibition in various plant extracts through agar disc-diffusion method.

| Test organism          | Zone of Inhibition (mm)    |         |          |          |         |            |
|------------------------|----------------------------|---------|----------|----------|---------|------------|
|                        | Plants Extract (100 µg/ml) |         |          |          |         |            |
|                        | A                          | B       | C        | D        | E       | F          |
| <i>Bacillus cereus</i> | 1.2±0.12                   | 2.2±0.6 | 3.5±0.12 | 1.4±0.11 | 1.3±0.1 | 10.23±0.08 |

|                               |          |          |          |          |         |           |
|-------------------------------|----------|----------|----------|----------|---------|-----------|
| <i>Bacillus licheniformis</i> | 1.4±0.4  | 3.2±0.11 | 2.1±0.23 | 1.1±0.12 | 1.5±0.5 | 13.1±0.3  |
| <i>Escherichia coli</i>       | 3.4±0.44 | 5.2±0.34 | 5.4±0.5  | 4.2±0.33 | 2.5±0.4 | 15.2±0.5  |
| <i>Pseudomonas aeruginosa</i> | 2.3±0.23 | 4.2±0.12 | 4.5±0.4  | 3.2±0.4  | 3.6±0.6 | 18.0±0.12 |

**Note:** ±: Standard deviation. A (*Phyllanthus emblica*), B (*Azadirachta indica*), C (*Capsicum annuum*), D (*Sapindus mukorossi*), E (*Plumeria obtuse*), F (*Cymbopogon citratus*). According to statistical one way Anova ( $P \leq 0.05$ ), mean values of rows differ from each other.

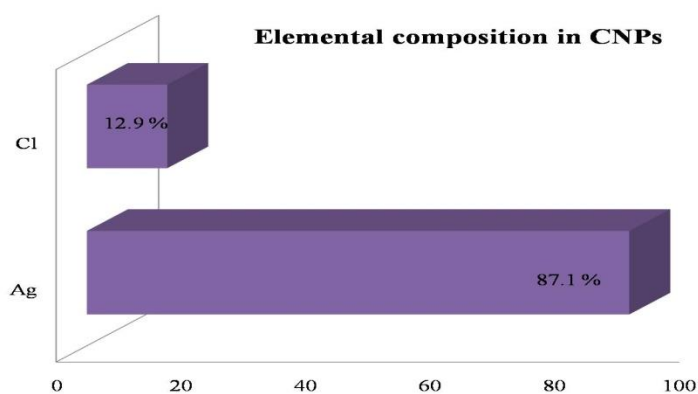

**Figure S2.** EDXRF graph illustrated the presence of elemental (Ag and Cl ) composition in CNPs

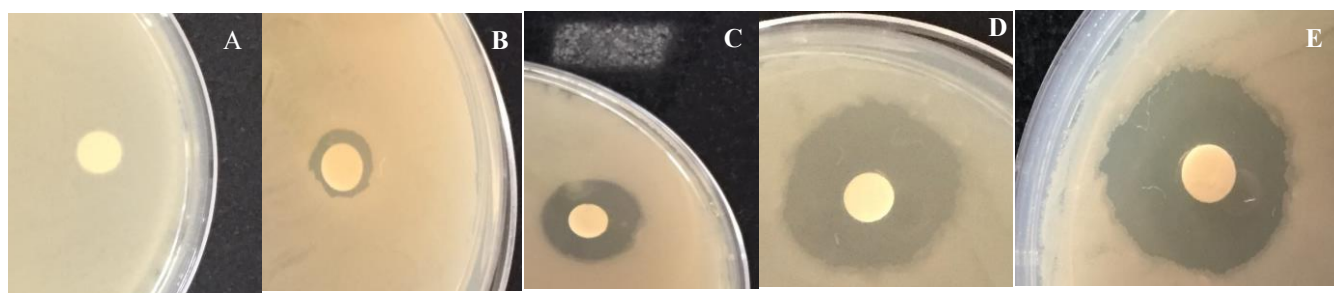

*Bacillus cereus*

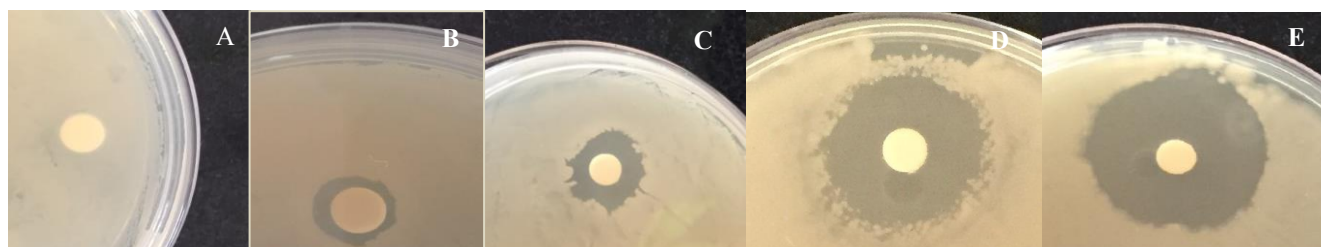

*Bacillus licheniformis*

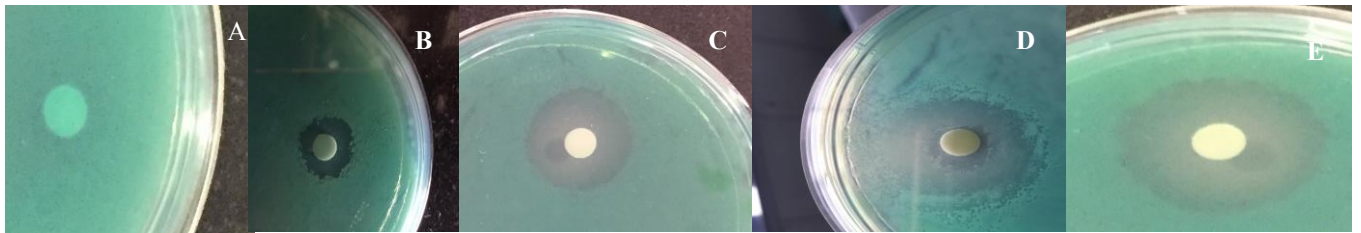

*Pseudomonas aeruginosa*

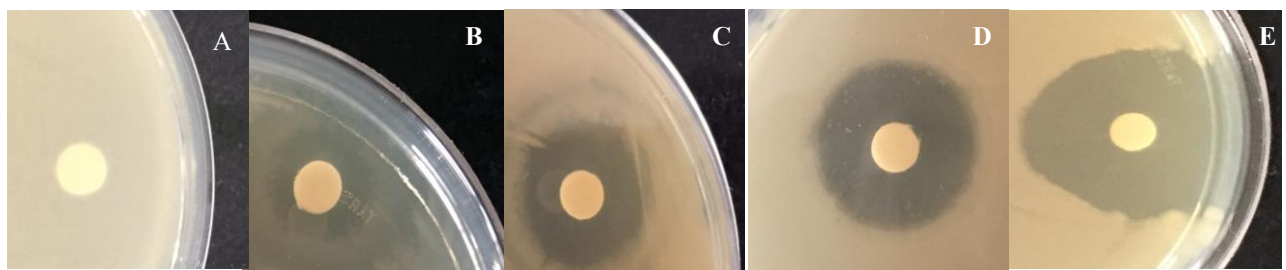

*Escherichia coli*

**Figure S3** Depicted the zones of inhibition of CNPs using agar disc-diffusion method in a range of C<sub>25</sub>-C<sub>150</sub> µg/ml concentration. Where a) Control (AgNO<sub>3</sub> 25 µg/ml) b) C<sub>25</sub> µg/ml c) C<sub>50</sub> µg/ml d) C<sub>100</sub> µg/ml and e) C<sub>150</sub> µg/ml
